# Supplementary material for: What is the cause(s) of ozone trends in three megacity clusters in eastern China during 2015–2020?
Source: Copernicus journal article supplement (doi:10.5194/acp-2022-781), 2023-01-03
Supplement: Supplementary file 1 [file acp-2022-781-supplement.pdf]

# **What is the cause(s) of ozone trends in three megacity clusters in eastern China during 2015–2020?**

Tingting Hu<sup>1</sup>, Yu Lin<sup>1</sup>, Run Liu<sup>1,2</sup>, Yuepeng Xu<sup>1</sup>, Boguang Wang<sup>1,2</sup>, Yuanhang Zhang<sup>3</sup>, Shaw Chen Liu<sup>1,2</sup>

<sup>1</sup>Institute for Environmental and Climate Research, Jinan University, Guangzhou, 511443, China

5 <sup>2</sup>Guangdong-Hongkong-Macau Joint Laboratory of Collaborative Innovation for Environmental Quality, Guangzhou, 511443, China

<sup>3</sup>State Key Joint Laboratory of Environmental Simulation and Pollution Control, College of Environmental Sciences and Engineering, Peking University, Beijing, 100871, China

*Correspondence to:* Run Liu (liurun@jnu.edu.cn), Shaw Chen Liu (shawliu@jnu.edu.cn)

## 10 Supplementary Figures

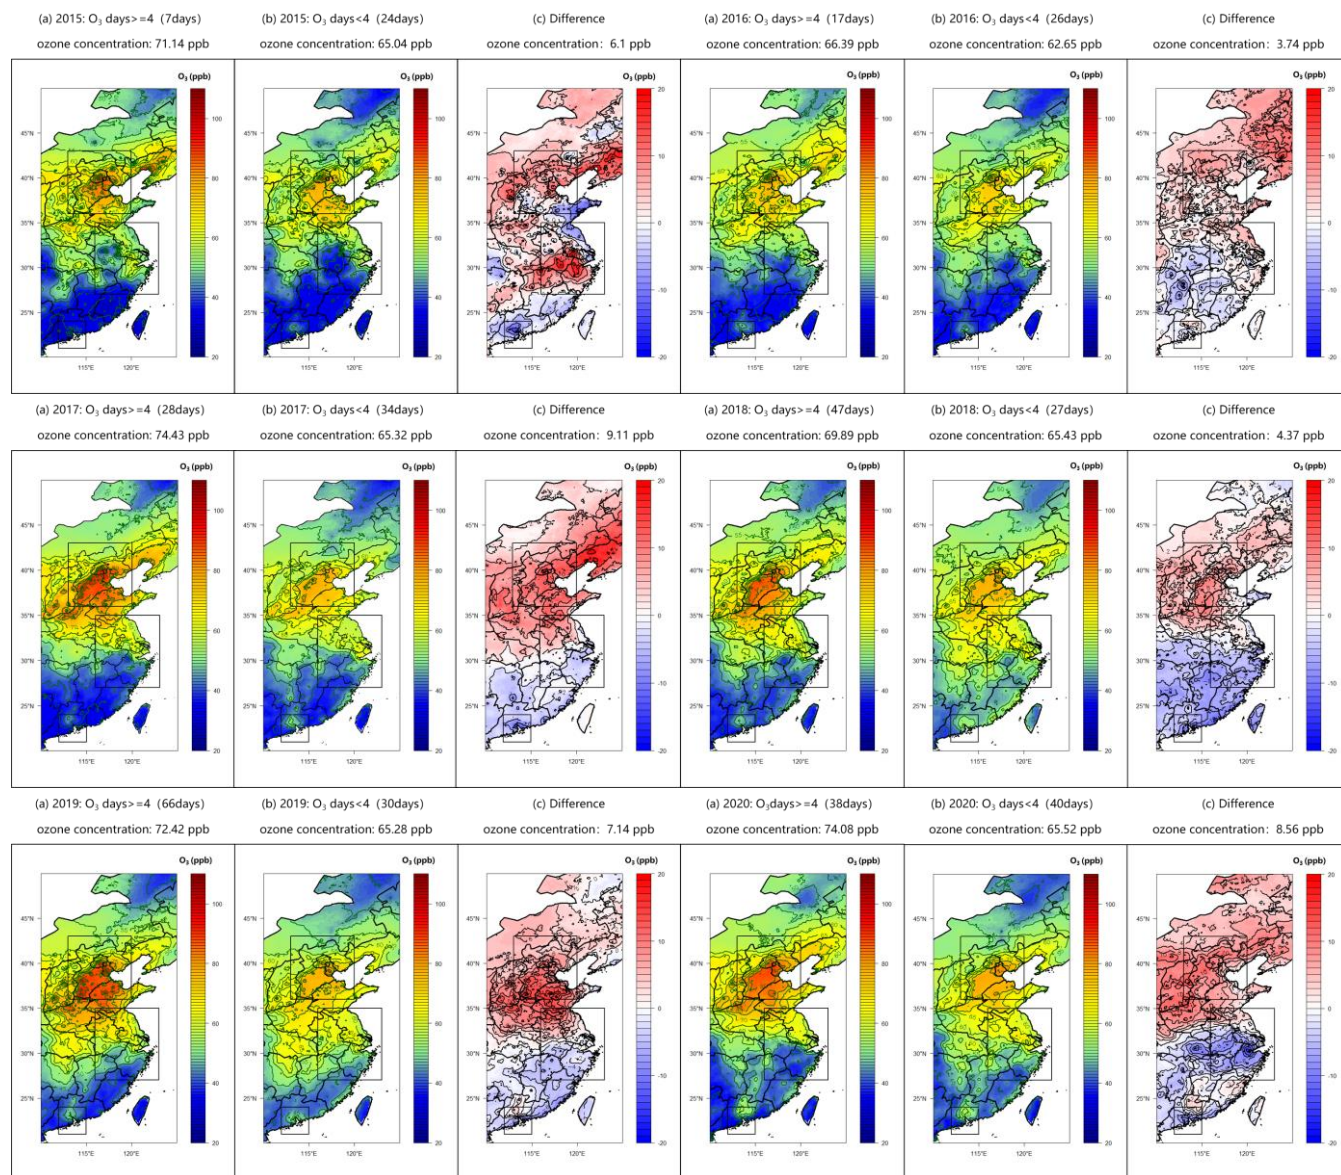

**Figure S1.** Spatial distribution of daily mean MDA8 O<sub>3</sub> (in ppb) of O<sub>3</sub>-exceeding days in BTH for O<sub>3</sub> episodes with four or more consecutive O<sub>3</sub>-exceeding days (a), episodes with less than four consecutive O<sub>3</sub>-exceeding days (b) and their difference (c) in 2015–2020.

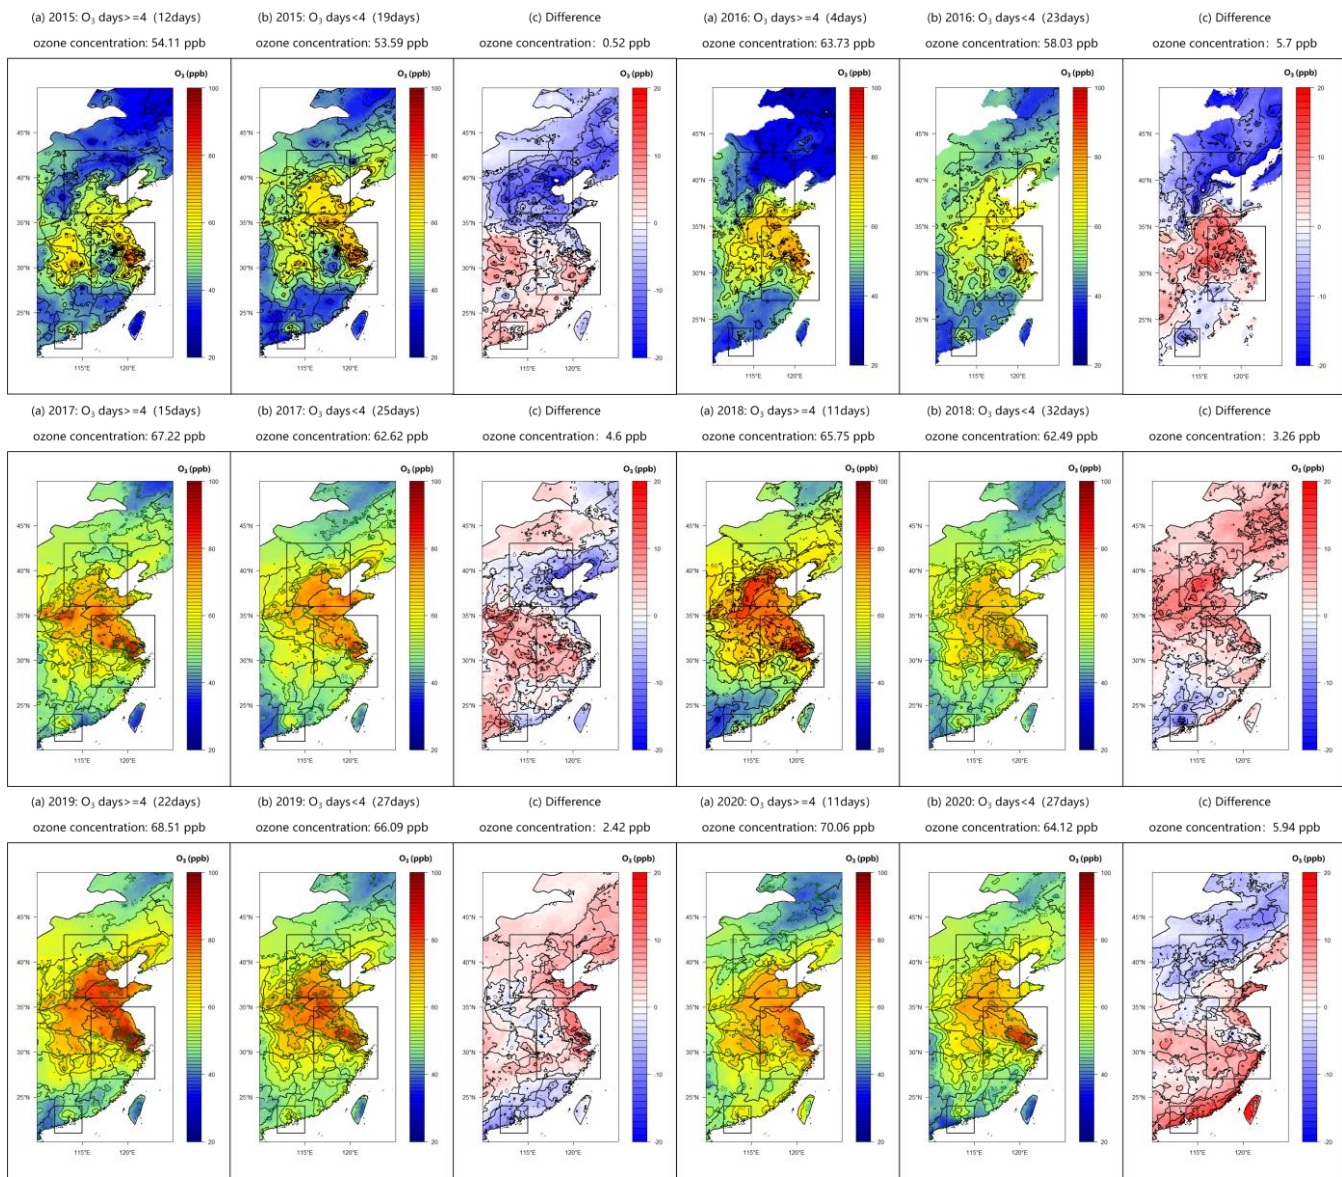

**Figure S2.** Same as Figure S1, but for YRD.

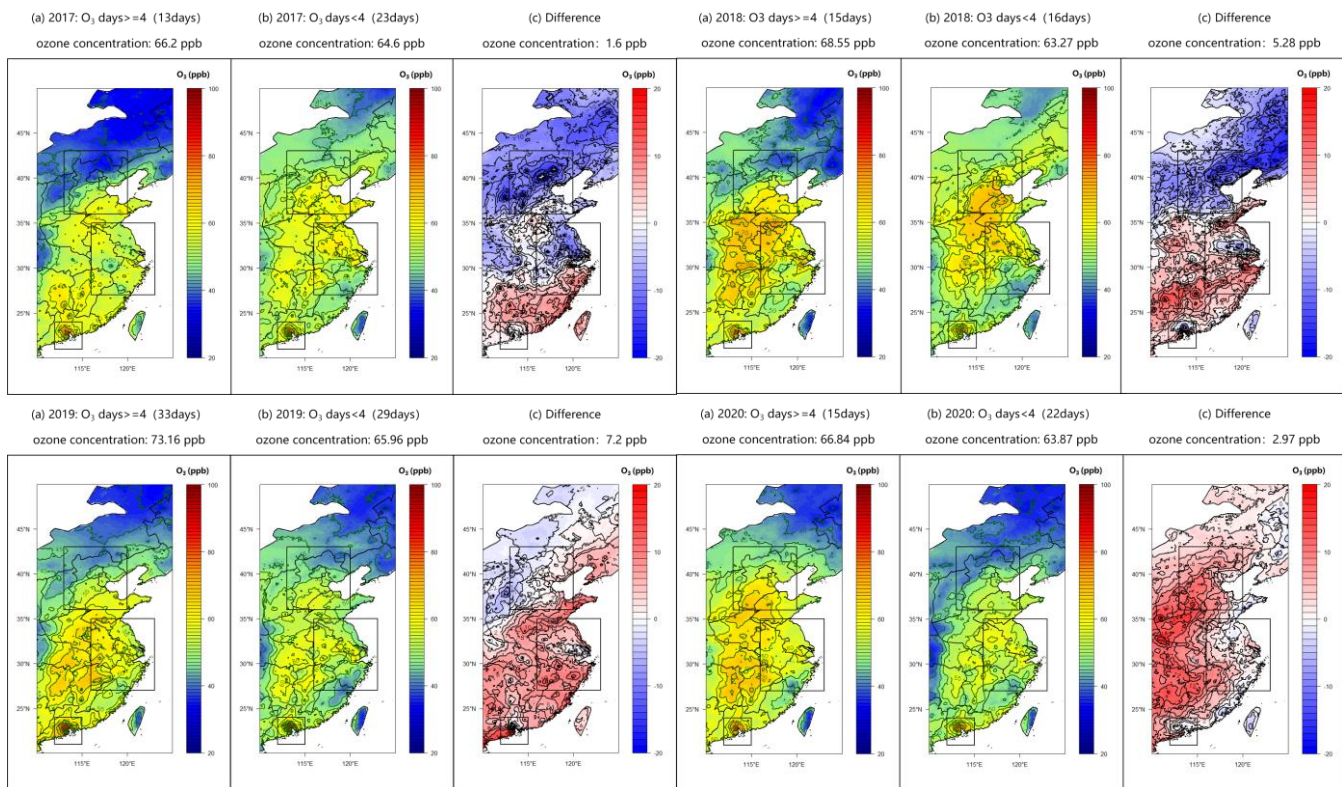

**Figure S3.** Same as Figure S1, but for PRD.

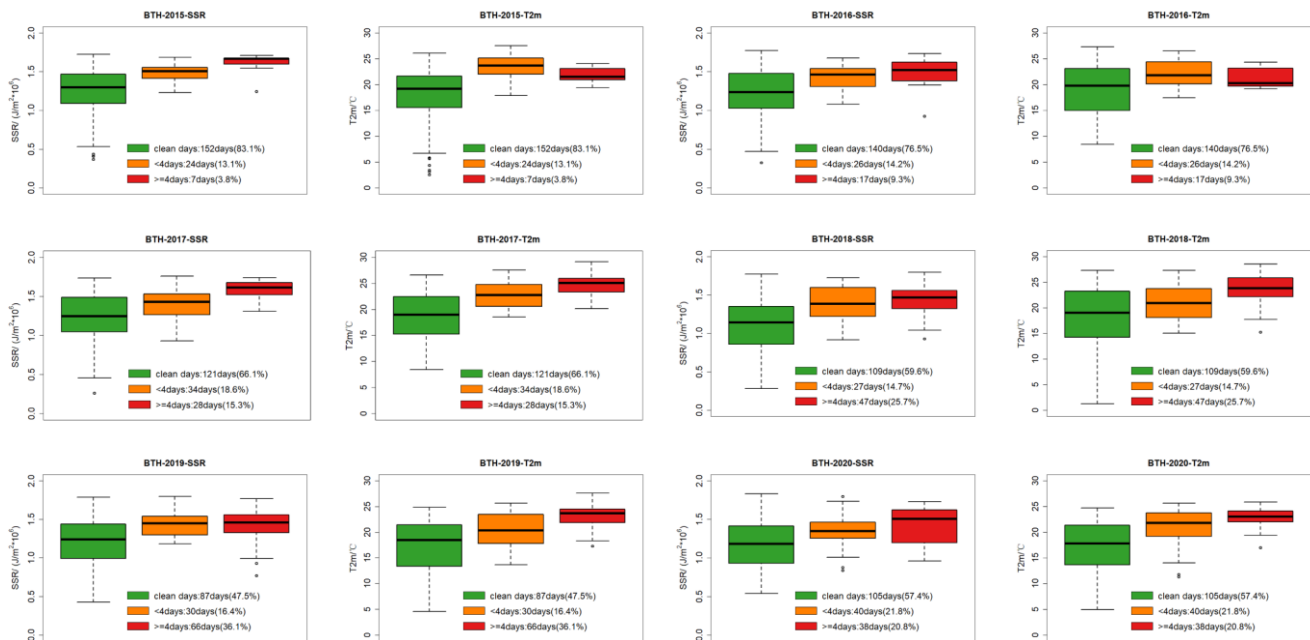

20 **Figure S4.** Surface solar radiation (SSR) and temperature (T2m) in BTH in 2015–2020 for episodes with four or more consecutive  $\text{O}_3$ -exceeding days (red), clean days (non- $\text{O}_3$ -exceeding days) (green) and episodes with less than four consecutive  $\text{O}_3$ -exceeding days (orange).

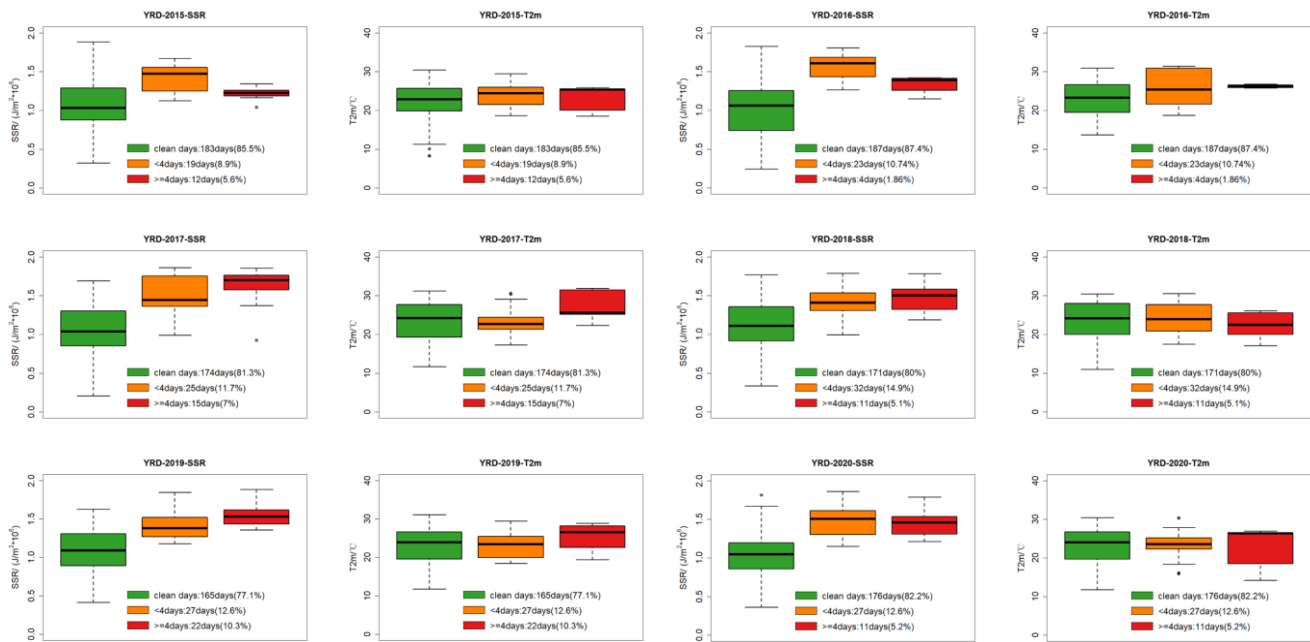

**Figure S5.** Same as Figure S4, but for YRD.

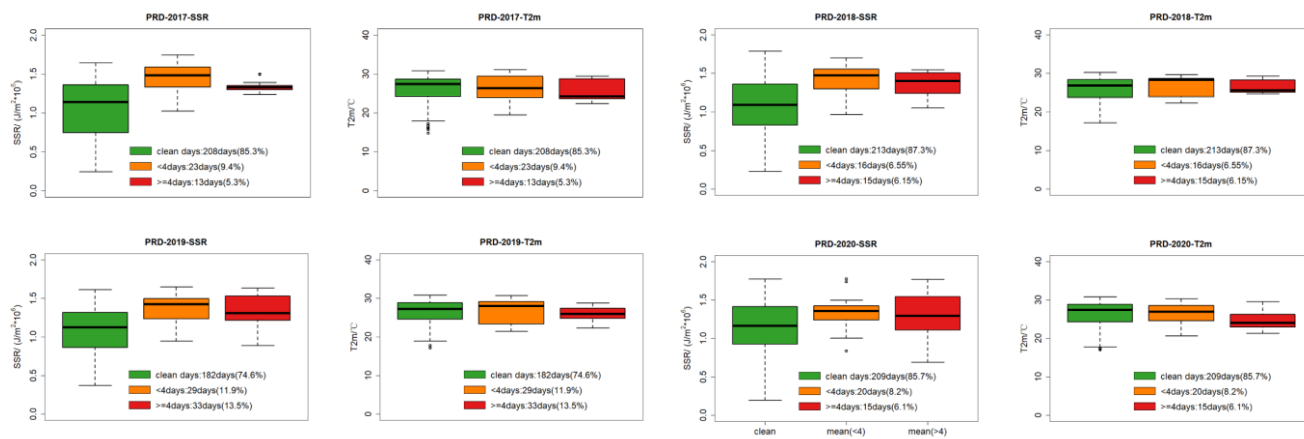

**Figure S6.** Same as Figure S4, but for PRD.
